# Supplementary material
Source: PubMed Central journal article supplement (PMC2788795)

# Supporting Information

## Validation of Molecular Docking Programs for Virtual Screening against Dihydropteroate Synthase

*Kirk E. Hevener,<sup>1</sup> Wei Zhao,<sup>3</sup> David M. Ball,<sup>1</sup> Kerim Babaoglu,<sup>2,4</sup> Jianjun Qi,<sup>1</sup> Stephen W. White,<sup>2,4</sup> and Richard E. Lee<sup>1,\*</sup>*

### CONTENTS with item descriptions:

#### LIST OF SUPPLEMENTAL TABLES

|                                                                                                                                                                |    |
|----------------------------------------------------------------------------------------------------------------------------------------------------------------|----|
| TABLE 1S. DOCK DOCKING OF THE ACD DECOY SET. COMPARISON OF P VALUES FOR AU-ROC'S (YELLOW) AND SSLR STATISTICS (GREEN) FOR EACH SCORING FUNCTION. ....          | S3 |
| TABLE 2S. DOCK DOCKING OF THE SCHRÖDINGER DECOY SET. COMPARISON OF P VALUES FOR AU-ROC'S (YELLOW) AND SSLR STATISTICS (GREEN) FOR EACH SCORING FUNCTION. ....  | S3 |
| TABLE 3S. DOCK DOCKING OF THE ZINC DECOY SET. COMPARISON OF P VALUES FOR AU-ROC'S (YELLOW) AND SSLR STATISTICS (GREEN) FOR EACH SCORING FUNCTION. ....         | S3 |
| TABLE 4S. FLEXX DOCKING OF THE ACD DECOY SET. COMPARISON OF P VALUES FOR AU-ROC'S (YELLOW) AND SSLR STATISTICS (GREEN) FOR EACH SCORING FUNCTION. ....         | S4 |
| TABLE 5S. FLEXX DOCKING OF THE SCHRÖDINGER DECOY SET. COMPARISON OF P VALUES FOR AU-ROC'S (YELLOW) AND SSLR STATISTICS (GREEN) FOR EACH SCORING FUNCTION. .... | S4 |
| TABLE 6S. FLEXX DOCKING OF THE ZINC DECOY SET. COMPARISON OF P VALUES FOR AU-ROC'S (YELLOW) AND SSLR STATISTICS (GREEN) FOR EACH SCORING FUNCTION. ....        | S4 |
| TABLE 7S. GLIDE DOCKING OF THE ACD DECOY SET. COMPARISON OF P VALUES FOR AU-ROC'S (YELLOW) AND SSLR STATISTICS (GREEN) FOR EACH SCORING FUNCTION. ....         | S5 |
| TABLE 8S. GLIDE DOCKING OF THE SCHRÖDINGER DECOY SET. COMPARISON OF P VALUES FOR AU-ROC'S (YELLOW) AND SSLR STATISTICS (GREEN) FOR EACH SCORING FUNCTION. .... | S5 |
| TABLE 9S. GOLD DOCKING OF THE ZINC DECOY SET. COMPARISON OF P VALUES FOR AU-ROC'S (YELLOW) AND SSLR STATISTICS (GREEN) FOR EACH SCORING FUNCTION. ....         | S6 |
| TABLE 10S. SURFLEX DOCKING OF THE ACD DECOY SET. COMPARISON OF P VALUES FOR AU-ROC'S (YELLOW) AND SSLR STATISTICS (GREEN) FOR EACH SCORING FUNCTION. ....      | S7 |
| TABLE 11S. SURFLEX DOCKING OF THE ZINC DECOY SET. COMPARISON OF P VALUES FOR AU-ROC'S (YELLOW) AND SSLR STATISTICS (GREEN) FOR EACH SCORING FUNCTION. ....     | S7 |

## LIST OF SUPPLEMENTAL FIGURES

|                                                           |     |
|-----------------------------------------------------------|-----|
| FIGURE 1S. DOCK - ACD DECOY SET, ROC CURVES .....         | S8  |
| FIGURE 2S. DOCK - SCHRODINGER DECOY SET, ROC CURVES.....  | S9  |
| FIGURE 3S. DOCK - ZINC DECOY SET, ROC CURVES .....        | S10 |
| FIGURE 4S. FLEXX - ACD DECOY SET, ROC CURVES .....        | S11 |
| FIGURE 5S. FLEXX - SCHRODINGER DECOY SET, ROC CURVES..... | S12 |
| FIGURE 6S. FLEXX - ZINC DECOY SET, ROC CURVES .....       | S13 |
| FIGURE 7S. GLIDE - ACD DECOY SET, ROC CURVES .....        | S14 |
| FIGURE 8S. GLIDE - SCHRODINGER DECOY SET, ROC CURVES..... | S15 |
| FIGURE 9S. GOLD - ZINC DECOY SET, ROC CURVES .....        | S16 |
| FIGURE 10S. SURFLEX - ACD DECOY SET, ROC CURVES .....     | S17 |
| FIGURE 11S. SURFLEX - ZINC DECOY SET, ROC CURVES .....    | S18 |
| FIGURE 12S. ZINC DECOY SET, ENRICHMENT AT 2% .....        | S19 |
| FIGURE 13S. SCHRODINGER DECOY SET, ENRICHMENT AT 2% ..... | S20 |
| FIGURE 14S. ACD DECOY SET, ENRICHMENT AT 2% .....         | S21 |

Table 1S. DOCK Docking of the ACD Decoy Set. Comparison of p values for AU-ROC's (yellow) and SSLR statistics (green) for each scoring function.

| Docking Program / Validation Set | Grid Score | F-Score | PMF-Score | G-Score | D-Score | ChemScore |
|----------------------------------|------------|---------|-----------|---------|---------|-----------|
| Grid Score                       | ---        | .748    | .155      | <.001   | <.001   | <.001     |
| F-Score                          | .237       | ---     | .298      | .016    | .551    | .004      |
| PMF-Score                        | .975       | .154    | ---       | <.001   | .006    | <.001     |
| G-Score                          | <.001      | .002    | <.001     | ---     | .004    | .764      |
| D-Score                          | <.001      | .024    | <.001     | .008    | ---     | .041      |
| ChemScore                        | .001       | .003    | <.001     | .265    | .043    | ---       |

Table 2S. DOCK Docking of the Schrödinger Decoy Set. Comparison of p values for AU-ROC's (yellow) and SSLR statistics (green) for each scoring function.

| Docking Program / Validation Set | Grid Score | F-Score | PMF-Score | G-Score | D-Score | ChemScore |
|----------------------------------|------------|---------|-----------|---------|---------|-----------|
| Grid Score                       | ---        | .762    | .003      | .002    | .003    | .007      |
| F-Score                          | .161       | ---     | .125      | .005    | .333    | <.001     |
| PMF-Score                        | <.001      | .774    | ---       | <.001   | <.001   | <.001     |
| G-Score                          | .008       | .002    | <.001     | ---     | .076    | .422      |
| D-Score                          | .056       | .053    | <.001     | .267    | ---     | .085      |
| ChemScore                        | .047       | <.001   | <.001     | .467    | .165    | ---       |

Table 3S. DOCK Docking of the ZINC Decoy Set. Comparison of p values for AU-ROC's (yellow) and SSLR statistics (green) for each scoring function.

| Docking Program / Validation Set | Grid Score | F-Score | PMF-Score | G-Score | D-Score | ChemScore |
|----------------------------------|------------|---------|-----------|---------|---------|-----------|
| Grid Score                       | ---        | .862    | .030      | <.001   | .002    | .001      |
| F-Score                          | .310       | ---     | .119      | .002    | .515    | .001      |
| PMF-Score                        | <.001      | .665    | ---       | <.001   | .001    | <.001     |
| G-Score                          | <.001      | .002    | <.001     | ---     | .005    | .924      |
| D-Score                          | <.001      | .077    | <.001     | .005    | ---     | .074      |
| ChemScore                        | .008       | .001    | <.001     | .911    | .162    | ---       |

Table 4S. FlexX Docking of the ACD Decoy Set. Comparison of p values for AU-ROC's (yellow) and SSLR statistics (green) for each scoring function.

| Docking Program / Validation Set | F-Score | PMF-Score | G-Score | D-Score | ChemScore |
|----------------------------------|---------|-----------|---------|---------|-----------|
| F-Score                          | ---     | .537      | <.001   | .019    | <.001     |
| PMF-Score                        | .485    | ---       | <.001   | .003    | <.001     |
| G-Score                          | .002    | <.001     | ---     | .005    | .918      |
| D-Score                          | .017    | <.001     | .001    | ---     | .010      |
| ChemScore                        | <.001   | <.001     | .331    | .033    | ---       |

Table 5S. FlexX Docking of the Schrödinger Decoy Set. Comparison of p values for AU-ROC's (yellow) and SSLR statistics (green) for each scoring function.

| Docking Program / Validation Set | F-Score | PMF-Score | G-Score | D-Score | ChemScore |
|----------------------------------|---------|-----------|---------|---------|-----------|
| F-Score                          | ---     | .032      | <.001   | .011    | <.001     |
| PMF-Score                        | .076    | ---       | <.001   | <.001   | <.001     |
| G-Score                          | .021    | <.001     | ---     | .023    | .324      |
| D-Score                          | .030    | <.001     | .049    | ---     | .001      |
| ChemScore                        | <.001   | <.001     | .184    | .028    | ---       |

Table 6S. FlexX Docking of the ZINC Decoy Set. Comparison of p values for AU-ROC's (yellow) and SSLR statistics (green) for each scoring function.

| Docking Program / Validation Set | F-Score | PMF-Score | G-Score | D-Score | ChemScore |
|----------------------------------|---------|-----------|---------|---------|-----------|
| F-Score                          | ---     | .052      | <.001   | .017    | <.001     |
| PMF-Score                        | .051    | ---       | <.001   | <.001   | <.001     |
| G-Score                          | .010    | <.001     | ---     | .006    | .471      |
| D-Score                          | .042    | <.001     | .013    | ---     | .001      |
| ChemScore                        | <.001   | <.001     | .224    | .028    | ---       |



Table 7S. Glide Docking of the ACD Decoy Set. Comparison of p values for AU-ROC's (yellow) and SSLR statistics (green) for each scoring function.

| Docking Program / Validation Set | Glide Score | F-Score | PMF-Score | G-Score | D-Score | ChemScore |
|----------------------------------|-------------|---------|-----------|---------|---------|-----------|
| Glide Score                      | ---         | .909    | .054      | <.001   | <.001   | <.001     |
| F-Score                          | .985        | ---     | .027      | <.001   | <.001   | <.001     |
| PMF-Score                        | .142        | .317    | ---       | <.001   | <.001   | <.001     |
| G-Score                          | <.001       | <.001   | <.001     | ---     | .022    | <.001     |
| D-Score                          | <.001       | <.001   | <.001     | .031    | ---     | .870      |
| ChemScore                        | .003        | <.001   | .002      | <.001   | .981    | ---       |

Table 8S. Glide Docking of the Schrödinger Decoy Set. Comparison of p values for AU-ROC's (yellow) and SSLR statistics (green) for each scoring function.

| Docking Program / Validation Set | Glide Score | F-Score | PMF-Score | G-Score | D-Score | ChemScore |
|----------------------------------|-------------|---------|-----------|---------|---------|-----------|
| Glide Score                      | ---         | .124    | .021      | <.001   | <.001   | <.001     |
| F-Score                          | .371        | ---     | .140      | <.001   | <.001   | <.001     |
| PMF-Score                        | .089        | .529    | ---       | <.001   | <.001   | <.001     |
| G-Score                          | <.001       | <.001   | <.001     | ---     | .338    | .236      |
| D-Score                          | <.001       | <.001   | <.001     | .342    | ---     | .966      |
| ChemScore                        | <.001       | <.001   | .005      | .625    | .811    | ---       |

Table 9S. GOLD Docking of the ZINC Decoy Set. Comparison of p values for AU-ROC's (yellow) and SSLR statistics (green) for each scoring function.

| Docking Program / Validation Set | GOLD Score | F-Score | PMF-Score | G-Score | D-Score | ChemScore |
|----------------------------------|------------|---------|-----------|---------|---------|-----------|
| GOLD Score                       | ---        | .077    | .029      | <.001   | <.001   | <.001     |
| F-Score                          | .005       | ---     | .863      | <.001   | <.001   | <.001     |
| PMF-Score                        | .007       | .708    | ---       | <.001   | <.001   | <.001     |
| G-Score                          | <.001      | .002    | <.001     | ---     | .958    | .024      |
| D-Score                          | <.001      | .002    | <.001     | .639    | ---     | .010      |
| ChemScore                        | <.001      | <.001   | <.001     | .221    | .012    | ---       |

Table 10S. Surflex Docking of the ACD Decoy Set. Comparison of p values for AU-ROC's (yellow) and SSLR statistics (green) for each scoring function.

| Docking Program / Validation Set | Surflex Score | F-Score | PMF-Score | G-Score | D-Score | ChemScore |
|----------------------------------|---------------|---------|-----------|---------|---------|-----------|
| Surflex Score                    | ---           | .963    | .002      | <.001   | <.001   | <.001     |
| F-Score                          | .460          | ---     | .008      | <.001   | <.001   | <.001     |
| PMF-Score                        | .003          | <.001   | ---       | <.001   | <.001   | <.001     |
| G-Score                          | <.001         | <.001   | <.001     | ---     | .001    | <.001     |
| D-Score                          | <.001         | <.001   | <.001     | ---     | ---     | .460      |
| ChemScore                        | <.001         | <.001   | <.001     | <.001   | .447    | ---       |

Table 11S. Surflex Docking of the ZINC Decoy Set. Comparison of p values for AU-ROC's (yellow) and SSLR statistics (green) for each scoring function.

| Docking Program / Validation Set | Surflex Score | F-Score | PMF-Score | G-Score | D-Score | ChemScore |
|----------------------------------|---------------|---------|-----------|---------|---------|-----------|
| Surflex Score                    | ---           | .499    | .172      | <.001   | <.001   | <.001     |
| F-Score                          | .475          | ---     | .327      | <.001   | <.001   | <.001     |
| PMF-Score                        | .194          | .472    | ---       | <.001   | <.001   | <.001     |
| G-Score                          | <.001         | <.001   | <.001     | ---     | .006    | <.001     |
| D-Score                          | <.001         | <.001   | <.001     | .021    | ---     | .249      |
| ChemScore                        | <.001         | <.001   | <.001     | <.001   | .258    | ---       |

Figure 1S. DOCK - ACD Decoy Set, ROC Curves

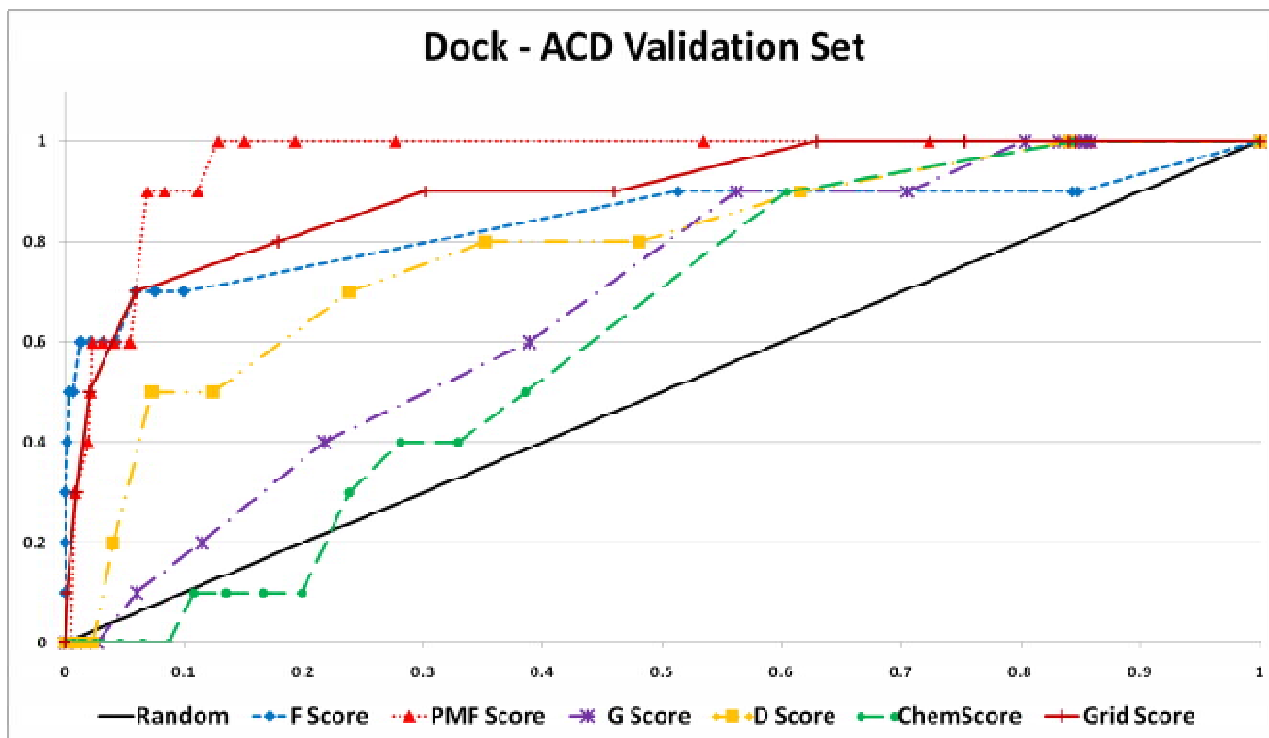

Figure 2S. DOCK - Schrodinger Decoy Set, ROC Curves

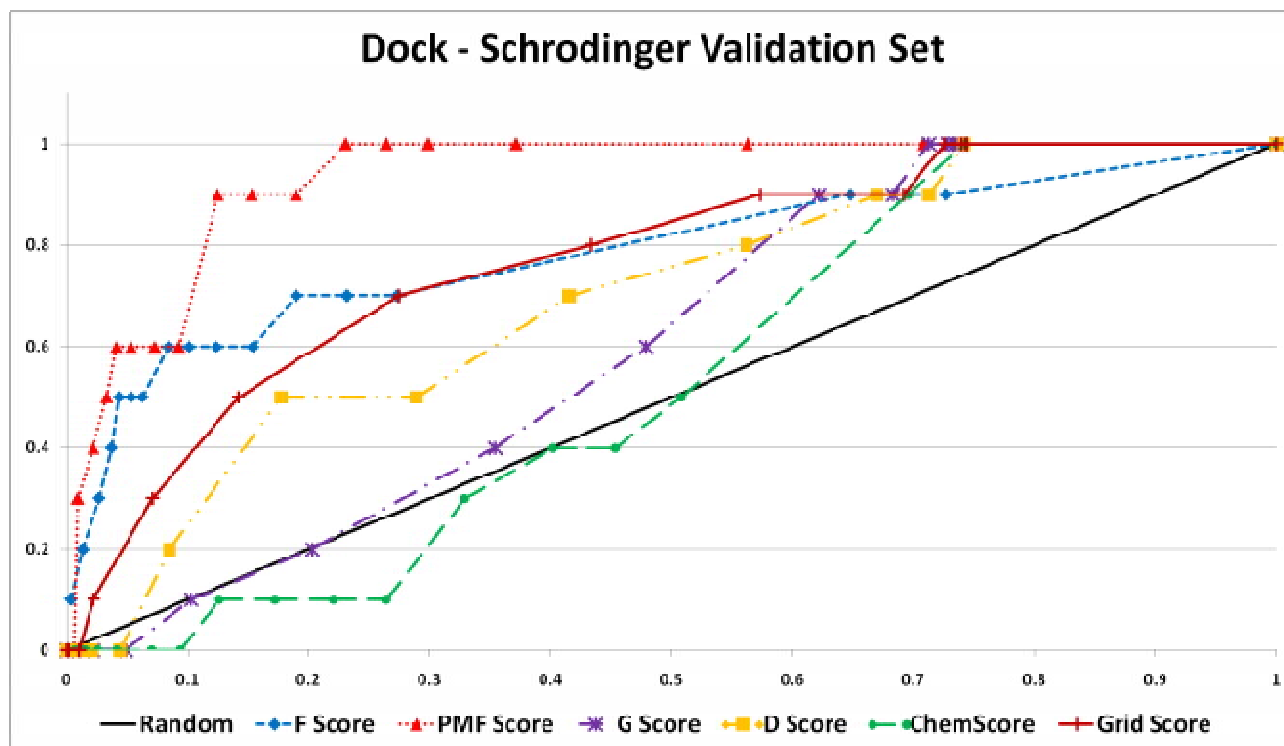

Figure 3S. DOCK - ZINC Decoy Set, ROC Curves

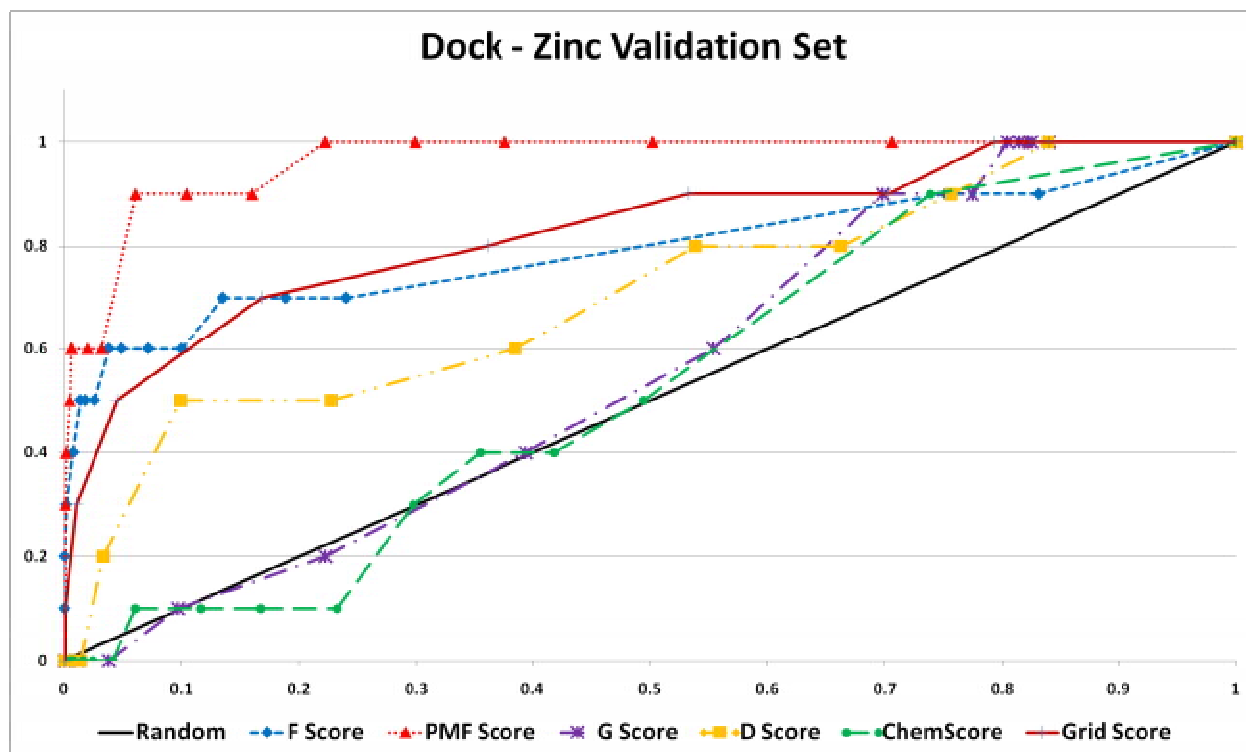

Figure 4S. FlexX - ACD Decoy Set, ROC Curves

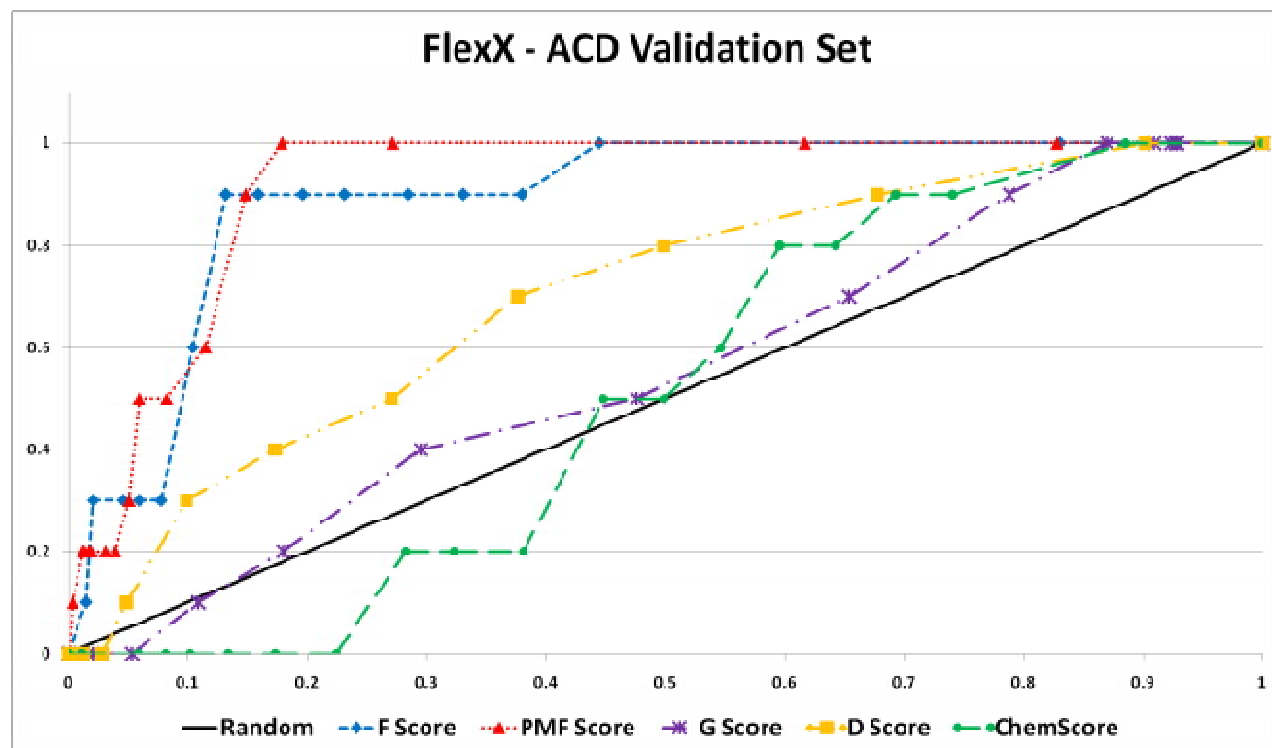

Figure 5S. FlexX - Schrodinger Decoy Set, ROC Curves

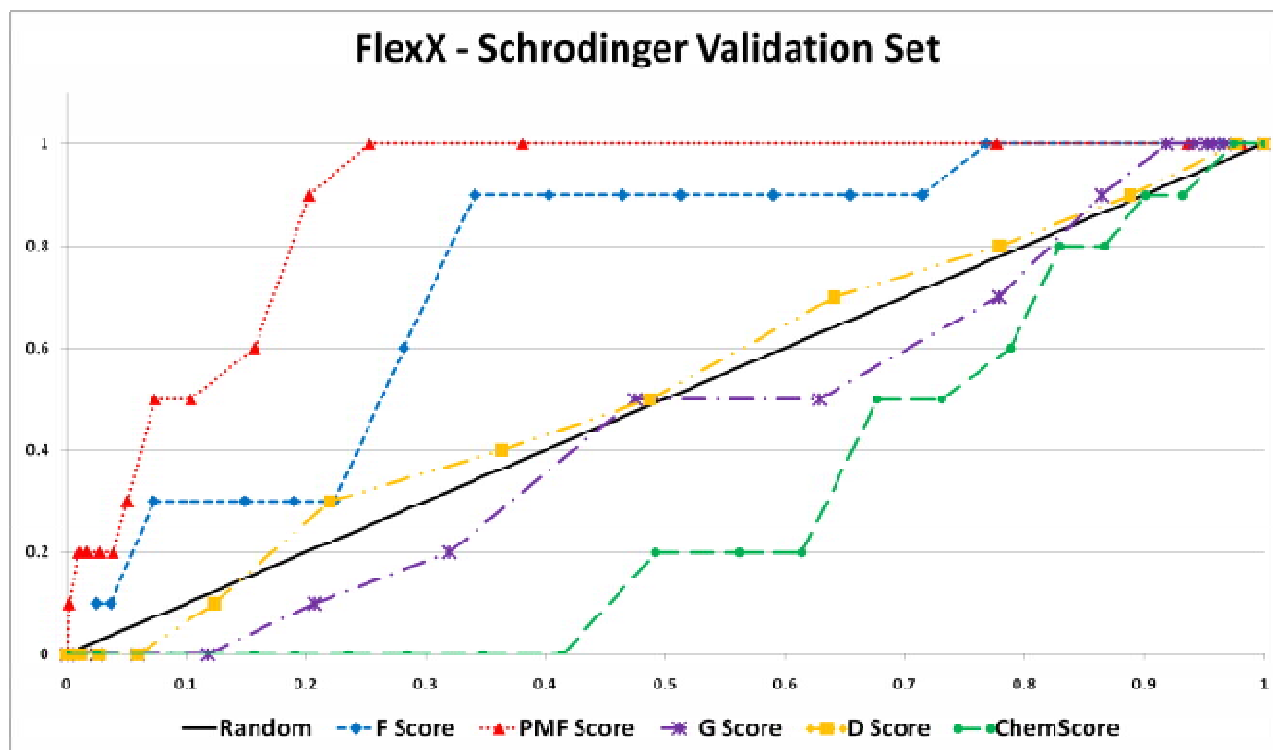



Figure 6S. FlexX - ZINC Decoy Set, ROC Curves

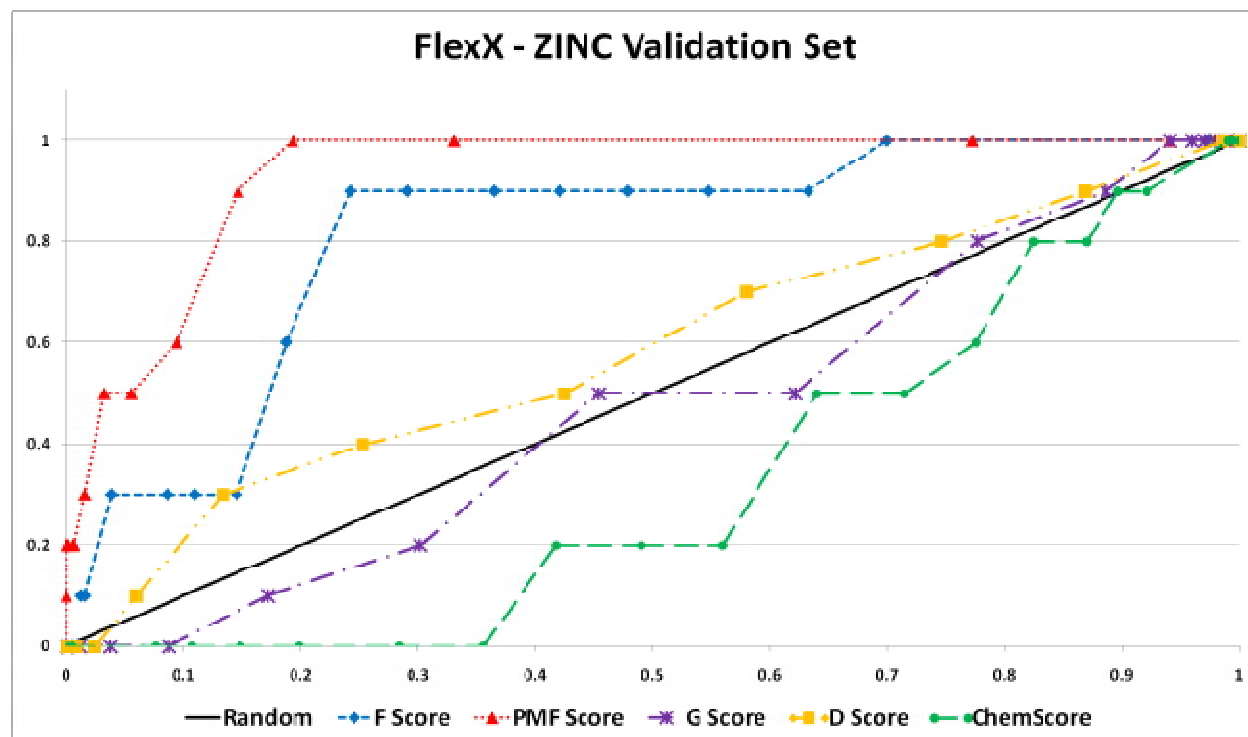

Figure 7S. Glide - ACD Decoy Set, ROC Curves

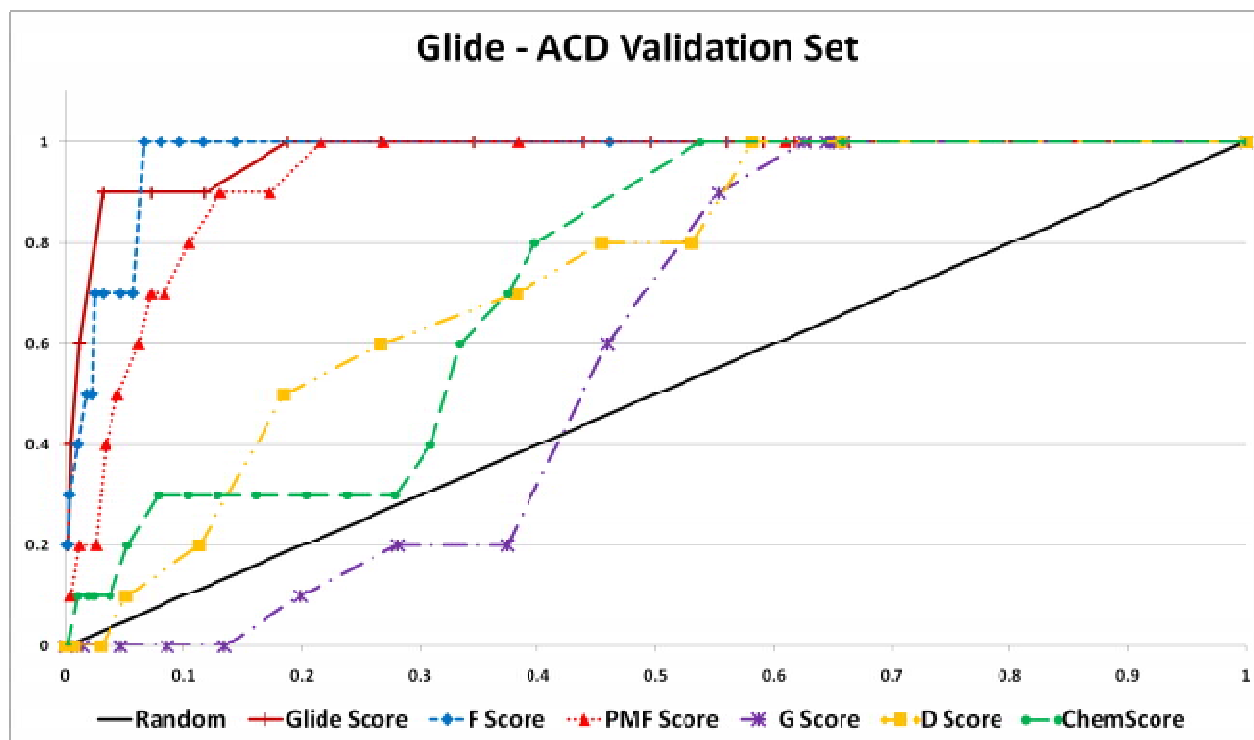

Figure 8S. Glide - Schrodinger Decoy Set, ROC Curves

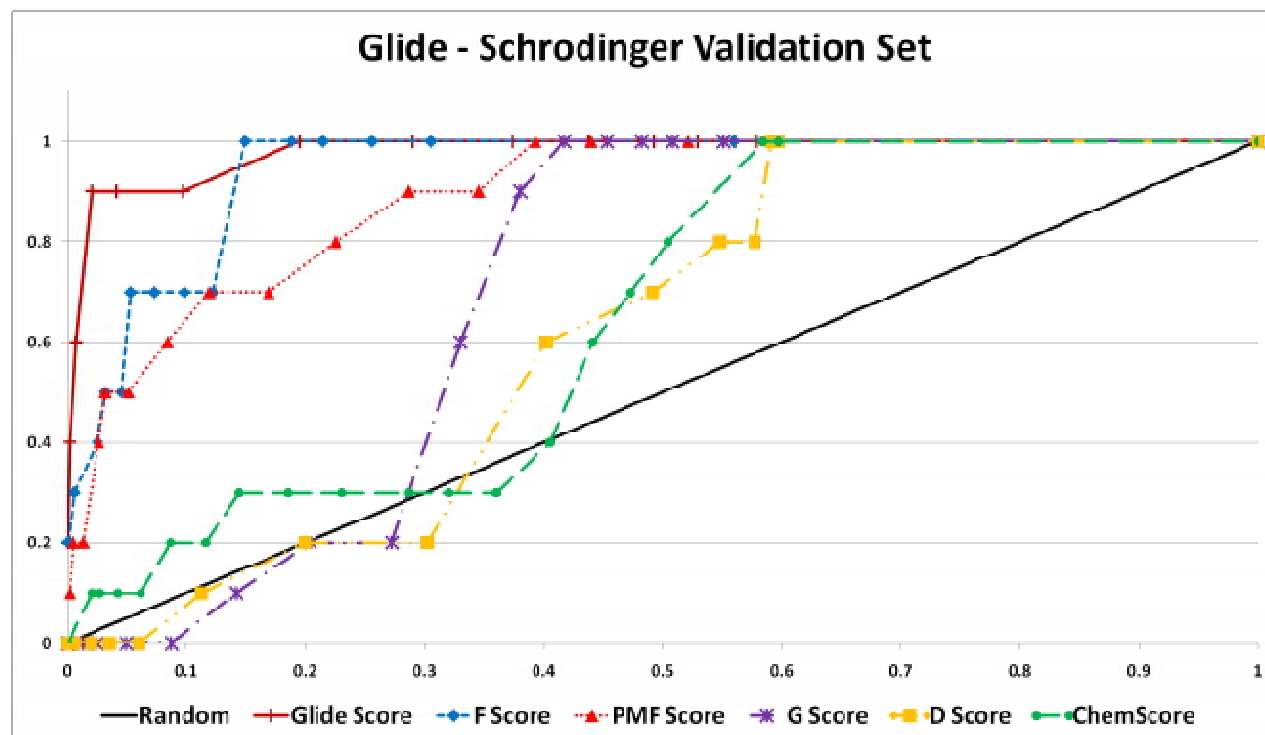

Figure 9S. Gold - ZINC Decoy Set, ROC Curves

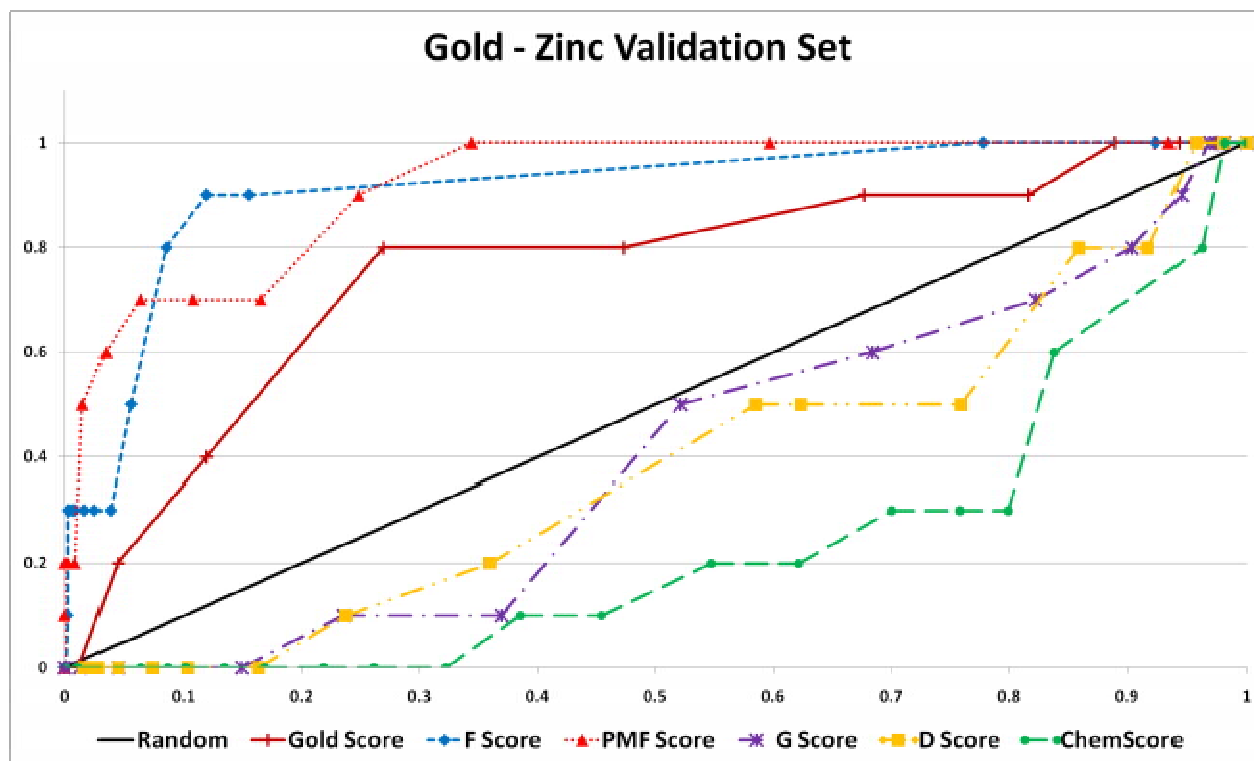

Figure 10S. Surfex - ACD Decoy Set, ROC Curves

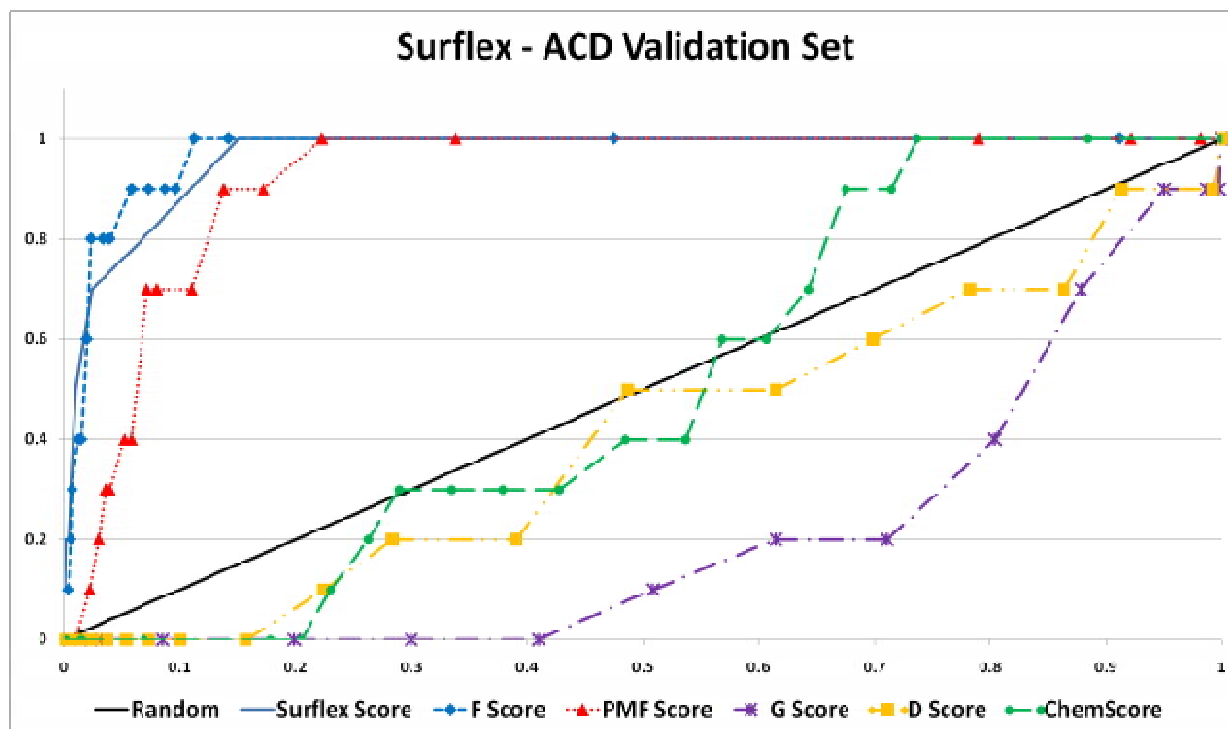

Figure 11S. Surflex - ZINC Decoy Set, ROC Curves

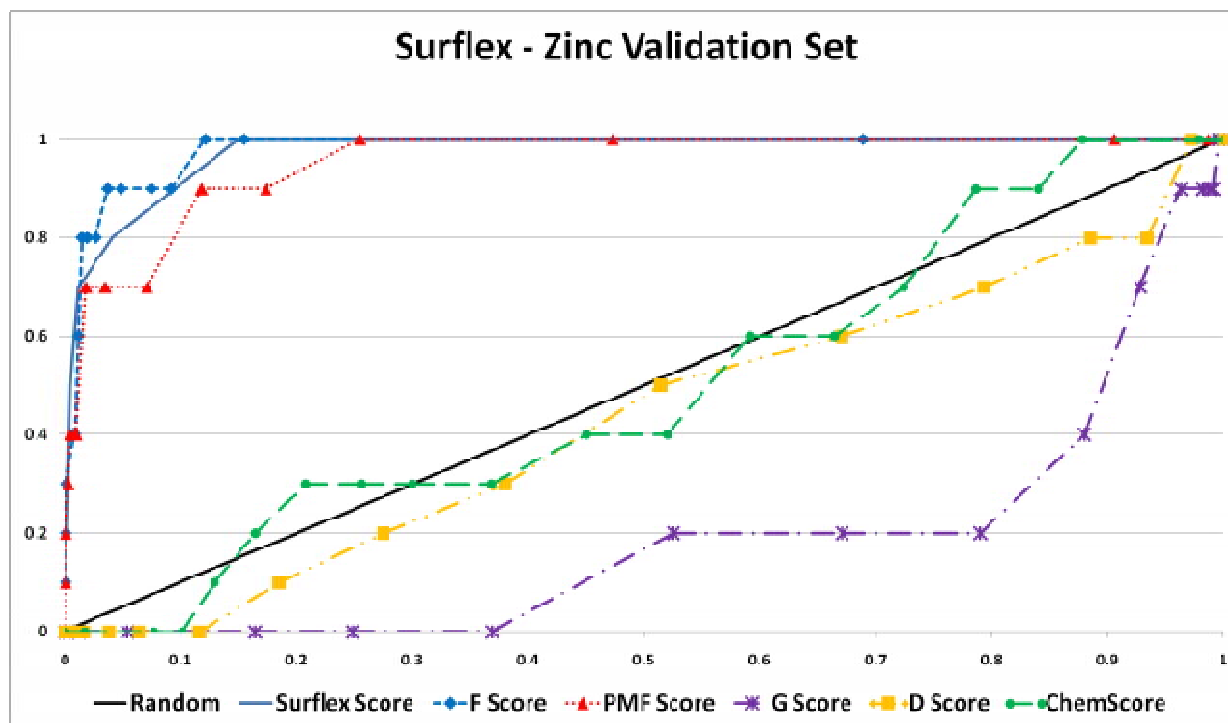

Figure 12S. ZINC Decoy Set, Enrichment at 2%

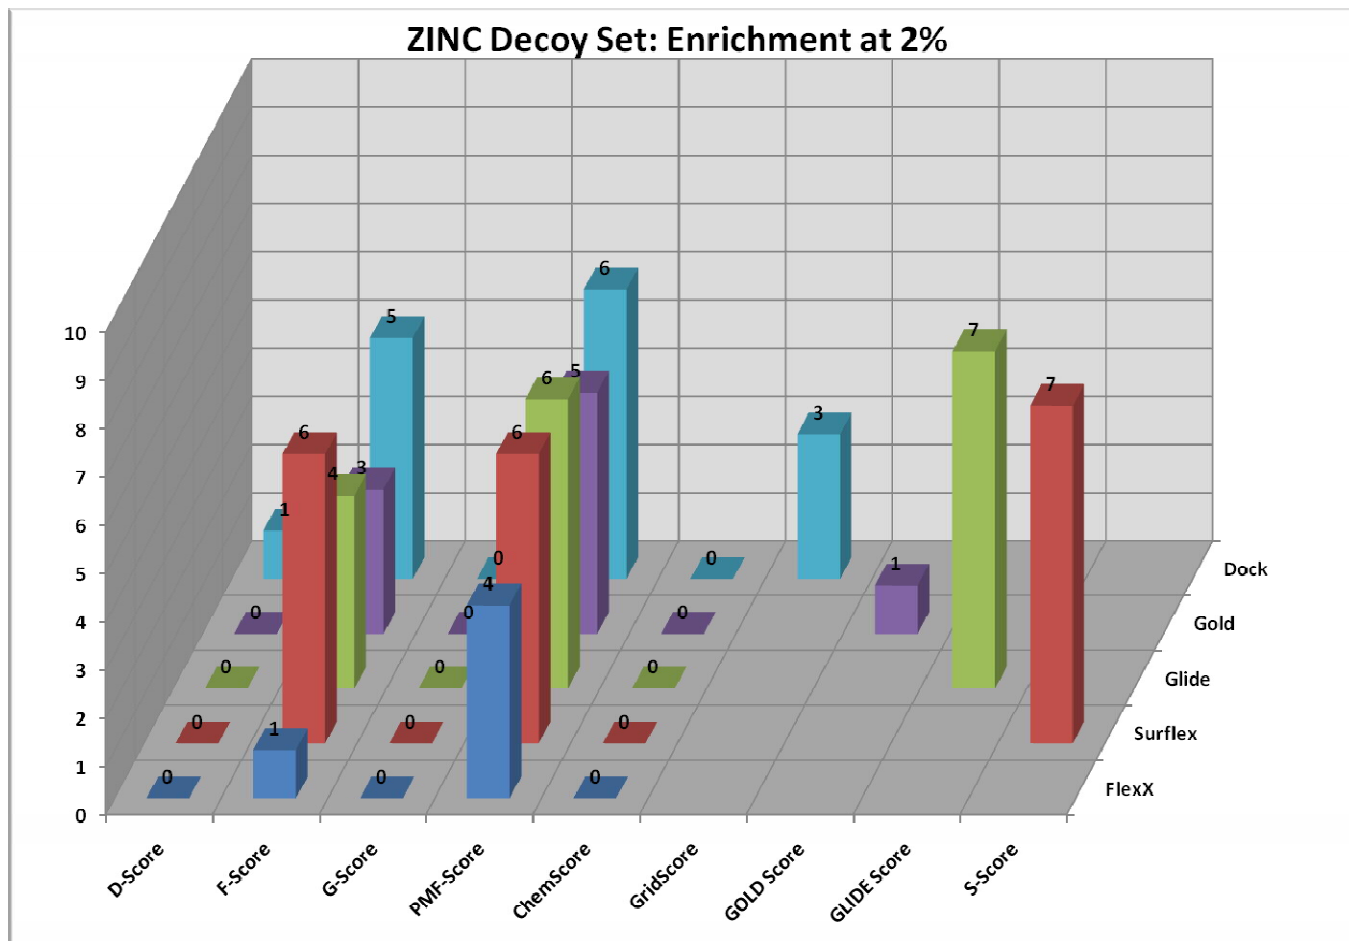

Figure 13S. Schrodinger Decoy Set, Enrichment at 2%

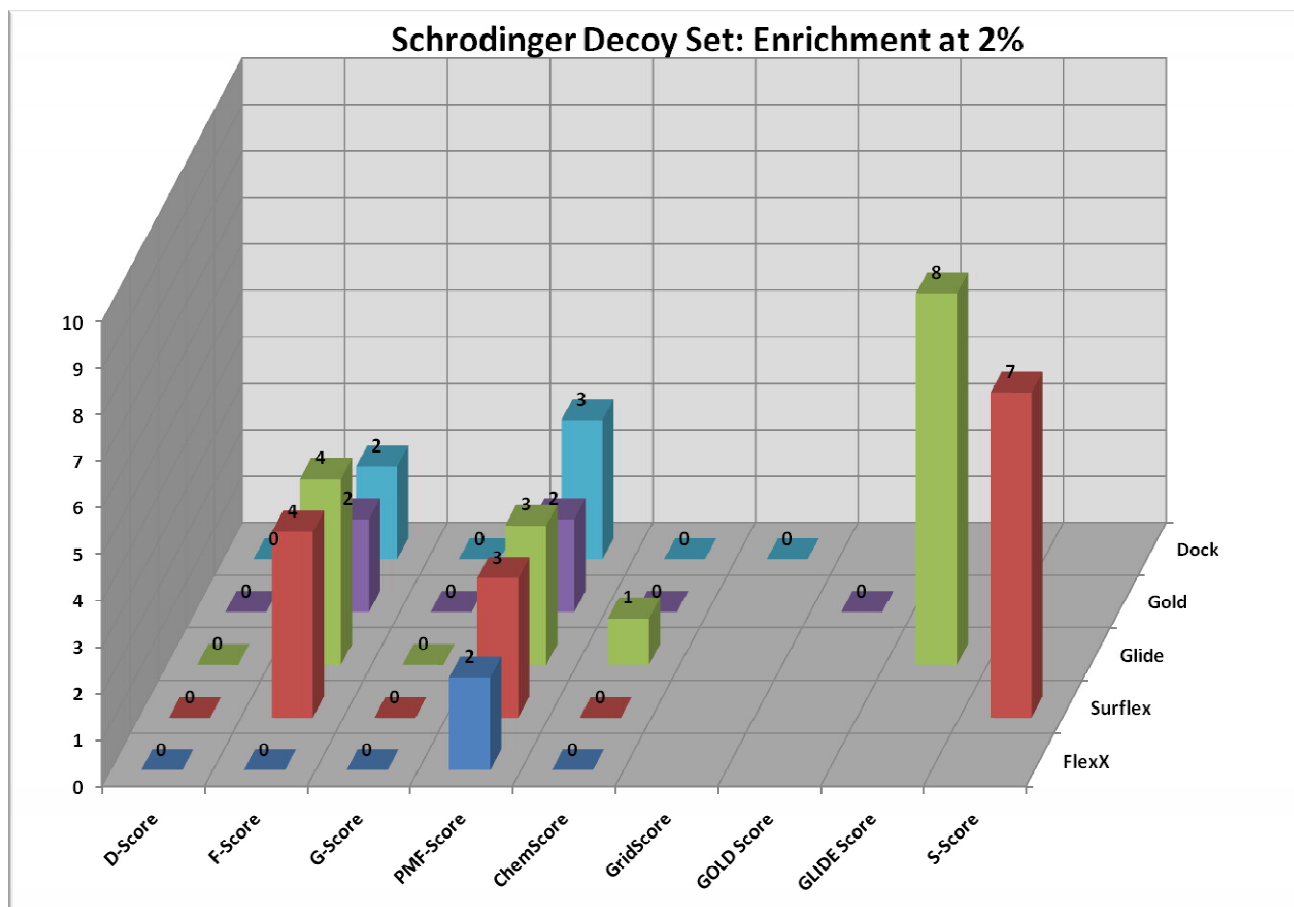



Figure 14S. ACD Decoy Set, Enrichment at 2%

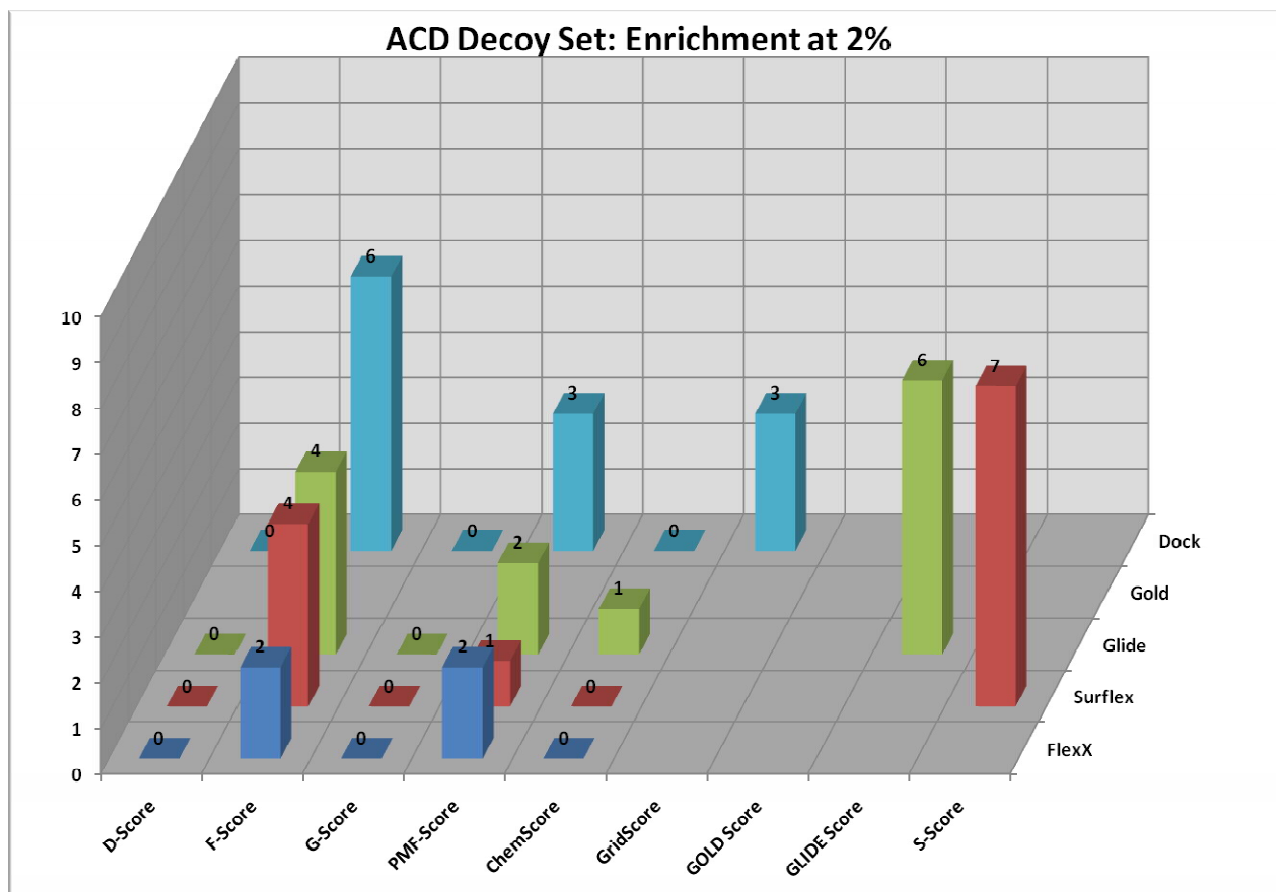

Supplement: NIHMS90543-supplement-1_si_001.pdf [file NIHMS90543-supplement-1_si_001.pdf]
